# Supplementary material for: Reference Gene Validation in the Brain Regions of Young Rats after Pentylenetetrazole-Induced Seizures
Source: MDPI journal article supplement (doi:10.3390/biomedicines8080239), 2020-07-23
Supplement: s1 [file s1]

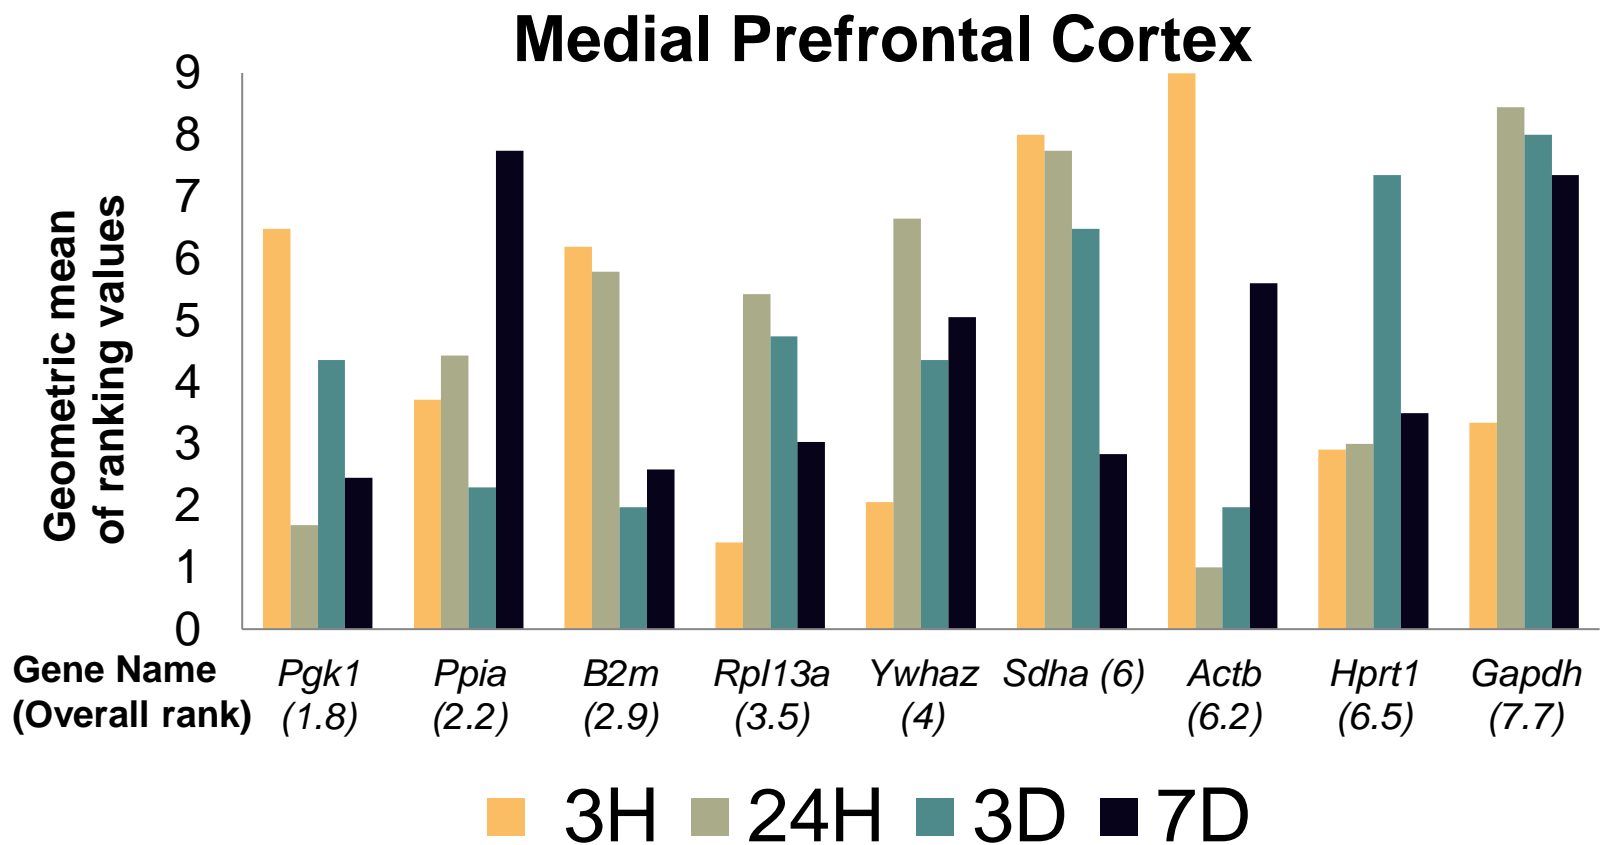

| Time after Seizures | RefFinder Comprehensive ranking (Most stable→Least stable) |                    |                   |                      |                     |                    |                     |                     |                            |
|---------------------|------------------------------------------------------------|--------------------|-------------------|----------------------|---------------------|--------------------|---------------------|---------------------|----------------------------|
| 3 h                 | <i>Rpl13a</i>                                              | <i>Ywhaz</i>       | <i>Hprt1</i>      | <i>Gapdh</i>         | <i>Ppia</i>         | <i>B2m</i>         | <i>Pgk1</i>         | <i>Sdha</i>         | <i>Actb</i>                |
| 24 h                | <i>Actb</i>                                                | <i>Pgk1</i>        | <i>Hprt1</i>      | <i>Ppia</i>          | <i>Rpl13a</i>       | <i>B2m</i>         | <u><i>Ywhaz</i></u> | <i>Sdha</i>         | <u><i>Gapdh</i></u>        |
| 3 days              | <i>B2m</i>                                                 | <i>Actb</i>        | <i>Ppia</i>       | <i>Ywhaz</i>         | <i>Pgk1</i>         | <i>Rpl13a</i>      | <i>Sdha</i>         | <i>Hprt1</i>        | <i>Gapdh</i>               |
| 7 days              | <i>Pgk1</i>                                                | <i>B2m</i>         | <i>Sdha</i>       | <i>Rpl13a</i>        | <i>Hprt1</i>        | <i>Ywhaz</i>       | <i>Actb</i>         | <i>Gapdh</i>        | <i>Ppia</i>                |
| Overall             | <b><i>Pgk1</i></b>                                         | <b><i>Ppia</i></b> | <b><i>B2m</i></b> | <b><i>Rpl13a</i></b> | <b><i>Ywhaz</i></b> | <b><i>Sdha</i></b> | <b><i>Actb</i></b>  | <b><i>Hprt1</i></b> | <b><u><i>Gapdh</i></u></b> |

**Figure S7.** The reference gene stability within the mPFC of control and PTZ-treated rats at different time points after seizures. Seizures was induced at P21. Gene expression stability in PTZ-treated and vehicle control animals at different time points (3 h, 1, 3, 7 days; n – 4-7 per group) was assessed by RefFinder online tool.

# Temporal Cortex

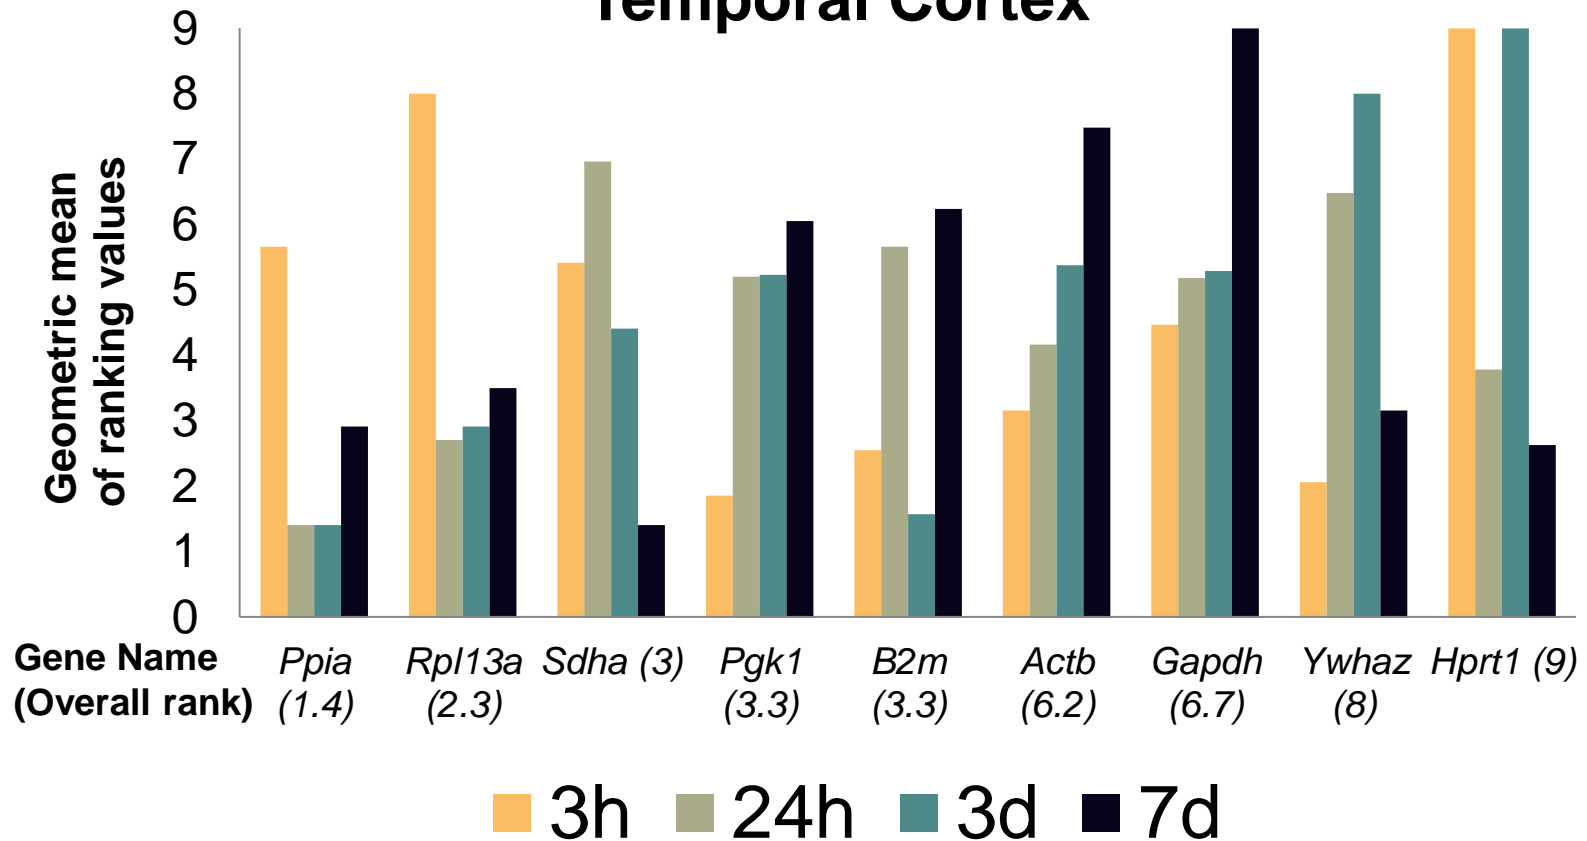

| Time after Seizures | RefFinder Comprehensive ranking (Most stable→Least stable) |                      |                    |                    |                   |                           |                     |                            |                            |
|---------------------|------------------------------------------------------------|----------------------|--------------------|--------------------|-------------------|---------------------------|---------------------|----------------------------|----------------------------|
| 3 h                 | <i>Pgk1</i>                                                | <i>Ywhaz</i>         | <i>B2m</i>         | <i>Actb</i>        | <i>Gapdh</i>      | <i>Sdha</i>               | <i>Ppia</i>         | <i>Rpl13a</i>              | <i>Hprt1</i>               |
| 24 h                | <i>Ppia</i>                                                | <i>Rpl13a</i>        | <i>Hprt1</i>       | <i>Actb</i>        | <i>Gapdh</i>      | <i>Pgk1</i>               | <i>B2m</i>          | <i>Ywhaz</i>               | <i>Sdha</i>                |
| 3 days              | <i>Ppia</i>                                                | <i>B2m</i>           | <i>Rpl13a</i>      | <u><i>Sdha</i></u> | <i>Pgk1</i>       | <i>Gapdh</i>              | <u><i>Actb</i></u>  | <u><i>Ywhaz</i></u>        | <u><i>Hprt1</i></u>        |
| 7 days              | <i>Sdha</i>                                                | <i>Hprt1</i>         | <i>Ppia</i>        | <i>Ywhaz</i>       | <i>Rpl13a</i>     | <i>Pgk1</i>               | <i>B2m</i>          | <u><i>Actb</i></u>         | <u><i>Gapdh</i></u>        |
| Overall             | <b><i>Ppia</i></b>                                         | <b><i>Rpl13a</i></b> | <b><i>Sdha</i></b> | <b><i>Pgk1</i></b> | <b><i>B2m</i></b> | <b><u><i>Actb</i></u></b> | <b><i>Gapdh</i></b> | <b><u><i>Ywhaz</i></u></b> | <b><u><i>Hprt1</i></u></b> |

**Figure S8.** The reference gene stability within the temporal cortex of control and PTZ-treated rats at different time points after seizures. Seizures was induced at P21. Gene expression stability in PTZ-treated and vehicle control animals at different time points (3 h, 1, 3, 7 days; n – 4-7 per group) was assessed by RefFinder online tool.

# Entorhinal Cortex

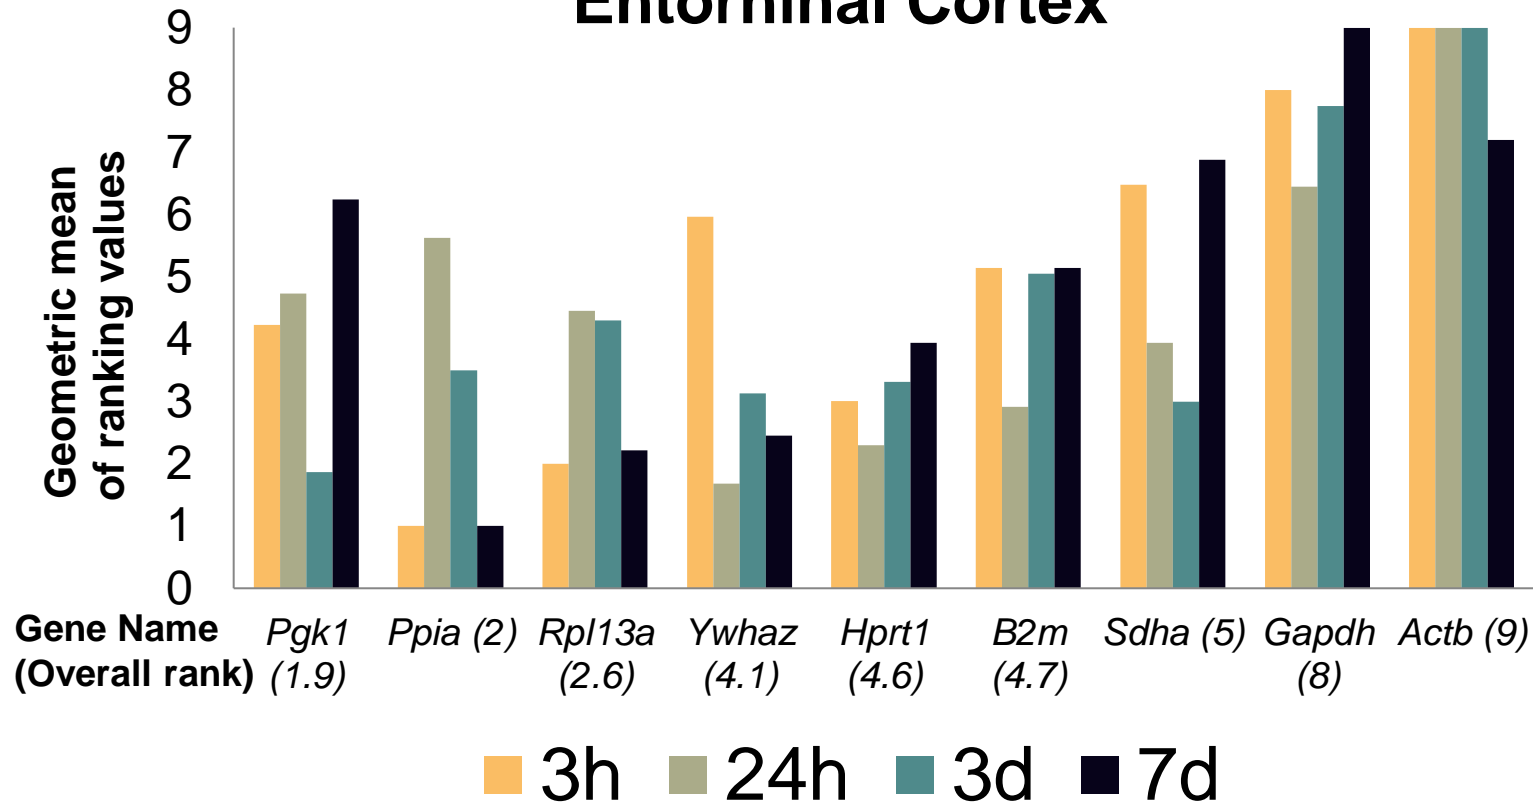

| Time after Seizures | RefFinder Comprehensive ranking (Most stable→Least stable) |                    |                      |                            |                            |                      |                           |                            |                           |
|---------------------|------------------------------------------------------------|--------------------|----------------------|----------------------------|----------------------------|----------------------|---------------------------|----------------------------|---------------------------|
| 3 h                 | <i>Ppia</i>                                                | <i>Rpl13a</i>      | <i>Hprt1</i>         | <i>Pgk1</i>                | <i>B2m</i>                 | <i>Ywhaz</i>         | <i>Sdha</i>               | <i>Gapdh</i>               | <i>Actb</i>               |
| 24 h                | <i>Ywhaz</i>                                               | <i>Hprt1</i>       | <i>B2m</i>           | <u><i>Sdha</i></u>         | <u><i>Rpl13a</i></u>       | <i>Pgk1</i>          | <u><i>Ppia</i></u>        | <u><i>Gapdh</i></u>        | <u><i>Actb</i></u>        |
| 3 days              | <i>Pgk1</i>                                                | <u><i>Sdha</i></u> | <i>Ywhaz</i>         | <i>Hprt1</i>               | <u><i>Ppia</i></u>         | <u><i>Rpl13a</i></u> | <u><i>B2m</i></u>         | <u><i>Gapdh</i></u>        | <u><i>Actb</i></u>        |
| 7 days              | <i>Ppia</i>                                                | <i>Rpl13a</i>      | <i>Ywhaz</i>         | <u><i>Hprt1</i></u>        | <i>B2m</i>                 | <u><i>Pgk1</i></u>   | <u><i>Sdha</i></u>        | <u><i>Actb</i></u>         | <u><i>Gapdh</i></u>       |
| Overall             | <b><i>Pgk1</i></b>                                         | <b><i>Ppia</i></b> | <b><i>Rpl13a</i></b> | <b><u><i>Ywhaz</i></u></b> | <b><u><i>Hprt1</i></u></b> | <b><i>B2m</i></b>    | <b><u><i>Sdha</i></u></b> | <b><u><i>Gapdh</i></u></b> | <b><u><i>Actb</i></u></b> |

**Figure S9.** The reference gene stability within the entorhinal cortex of control and PTZ-treated rats at different time points after seizures. Seizures was induced at P21. Gene expression stability in PTZ-treated and vehicle control animals at different time points (3 h, 1, 3, 7 days; n – 4-7 per group) was assessed by RefFinder online tool.

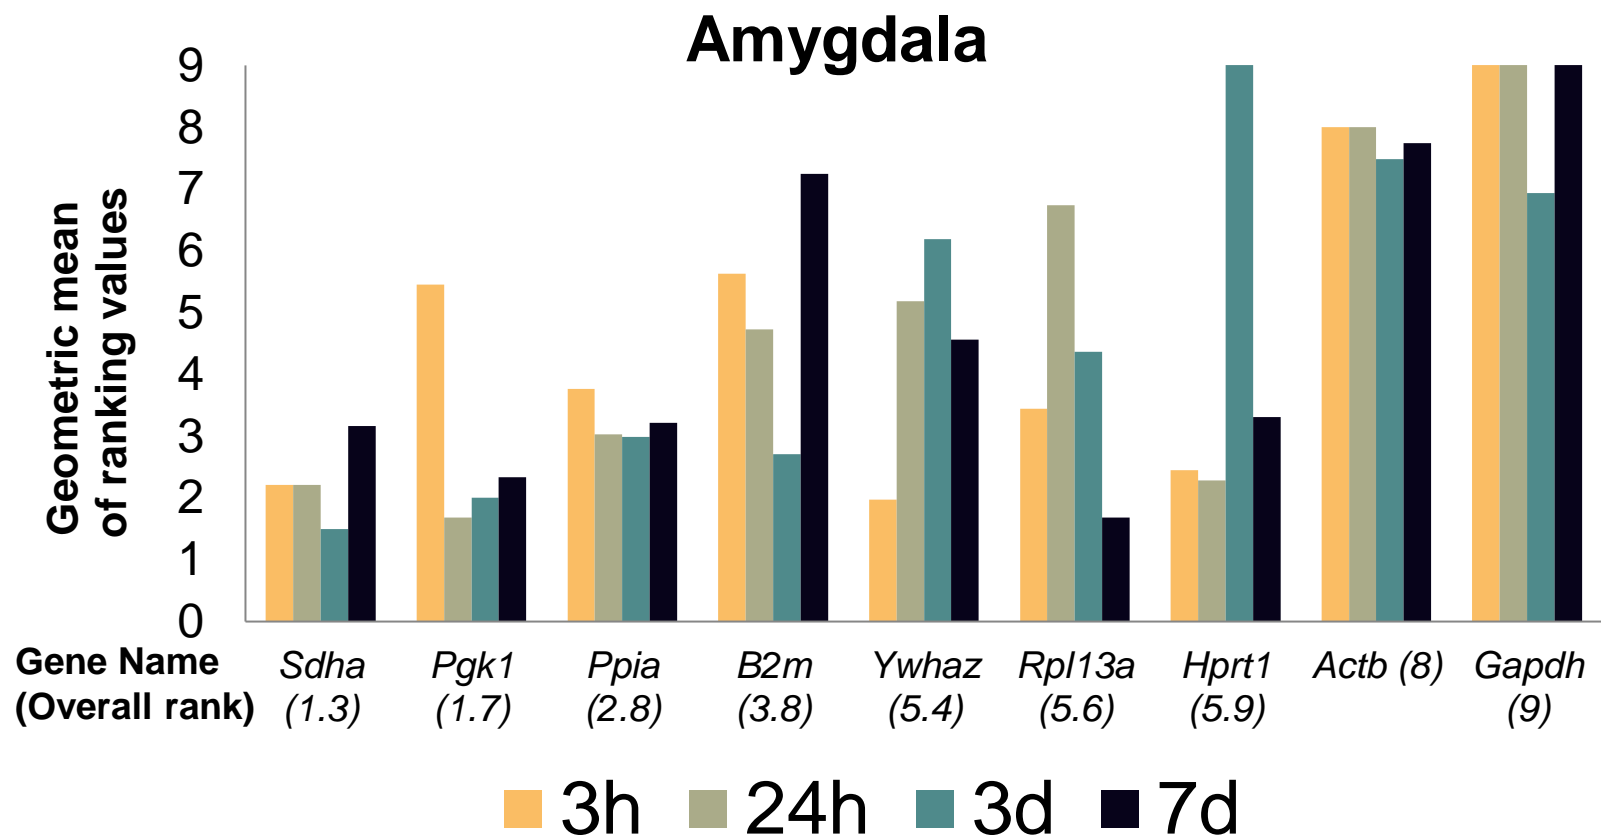

| Time after Seizures | RefFinder Comprehensive ranking (Most stable→Least stable) |             |              |               |               |               |               |             |              |
|---------------------|------------------------------------------------------------|-------------|--------------|---------------|---------------|---------------|---------------|-------------|--------------|
| <b>3 h</b>          | <i>Ywhaz</i>                                               | <i>Sdha</i> | <i>Hprt1</i> | <i>Rpl13a</i> | <i>Ppia</i>   | <i>Pkg1</i>   | <i>B2m</i>    | <i>Actb</i> | <i>Gapdh</i> |
| <b>24 h</b>         | <i>Pkg1</i>                                                | <i>Sdha</i> | <i>Hprt1</i> | <i>Ppia</i>   | <i>B2m</i>    | <i>Ywhaz</i>  | <i>Rpl13a</i> | <i>Actb</i> | <i>Gapdh</i> |
| <b>3 days</b>       | <i>Sdha</i>                                                | <i>Pkg1</i> | <i>B2m</i>   | <i>Ppia</i>   | <i>Rpl13a</i> | <i>Ywhaz</i>  | <i>Gapdh</i>  | <i>Actb</i> | <i>Hprt1</i> |
| <b>7 days</b>       | <i>Rpl13a</i>                                              | <i>Pkg1</i> | <i>Sdha</i>  | <i>Ppia</i>   | <i>Hprt1</i>  | <i>Ywhaz</i>  | <i>B2m</i>    | <i>Actb</i> | <i>Gapdh</i> |
| <b>Overall</b>      | <i>Sdha</i>                                                | <i>Pkg1</i> | <i>Ppia</i>  | <i>B2m</i>    | <i>Ywhaz</i>  | <i>Rpl13a</i> | <i>Hprt1</i>  | <i>Actb</i> | <i>Gapdh</i> |

**Figure S10.** The reference gene stability within the amygdala of control and PTZ-treated rats at different time points after seizures. Seizures was induced at P21. Gene expression stability in PTZ-treated and vehicle control animals at different time points (3 h, 1, 3, 7 days; n – 4-7 per group) was assessed by RefFinder online tool.

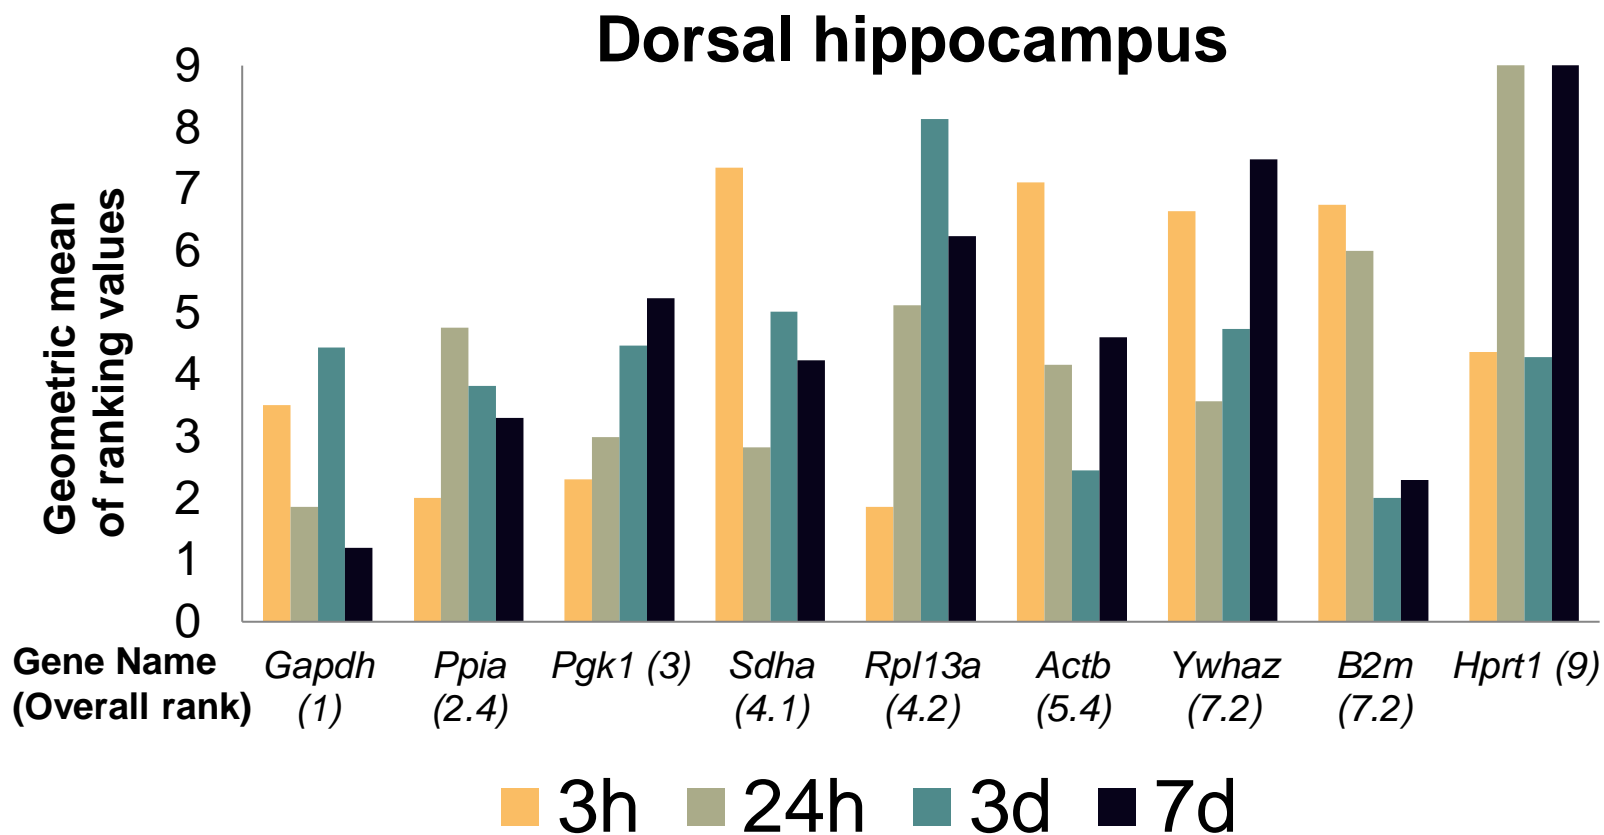

| Time after Seizures | RefFinder Comprehensive ranking (Most stable→Least stable) |                      |                    |                    |                   |                           |                     |                            |                            |
|---------------------|------------------------------------------------------------|----------------------|--------------------|--------------------|-------------------|---------------------------|---------------------|----------------------------|----------------------------|
| <b>3 h</b>          | <i>Rpl13a</i>                                              | <i>Ppia</i>          | <i>Pgk1</i>        | <i>Gapdh</i>       | <i>Hprt1</i>      | <i>Ywhaz</i>              | <i>B2m</i>          | <i>Actb</i>                | <i>Sdha</i>                |
| <b>24 h</b>         | <i>Gapdh</i>                                               | <i>Sdha</i>          | <i>Pgk1</i>        | <i>Ywhaz</i>       | <i>Actb</i>       | <u><i>Ppia</i></u>        | <i>Rpl13a</i>       | <i>B2m</i>                 | <u><i>Hprt1</i></u>        |
| <b>3 days</b>       | <i>B2m</i>                                                 | <i>Actin</i>         | <i>Ppia</i>        | <i>Hprt1</i>       | <i>Gapdh</i>      | <i>Pgk1</i>               | <i>Ywhaz</i>        | <i>Sdha</i>                | <i>Rpl13a</i>              |
| <b>7 days</b>       | <i>Gapdh</i>                                               | <i>B2m</i>           | <i>Ppia</i>        | <i>Sdha</i>        | <i>Actin</i>      | <i>Pgk1</i>               | <i>Rpl13a</i>       | <i>Ywhaz</i>               | <u><i>Hprt1</i></u>        |
| <b>Overall</b>      | <b><i>Ppia</i></b>                                         | <b><i>Rpl13a</i></b> | <b><i>Sdha</i></b> | <b><i>Pgk1</i></b> | <b><i>B2m</i></b> | <b><u><i>Actb</i></u></b> | <b><i>Gapdh</i></b> | <b><u><i>Ywhaz</i></u></b> | <b><u><i>Hprt1</i></u></b> |

**Figure S11.** The reference gene stability within the dorsal hippocampus of control and PTZ-treated rats at different time points after seizures. Seizures was induced at P21. Gene expression stability in PTZ-treated and vehicle control animals at different time points (3 h, 1, 3, 7 days; n – 4-7 per group) was assessed by RefFinder online tool.

# Ventral Hippocampus

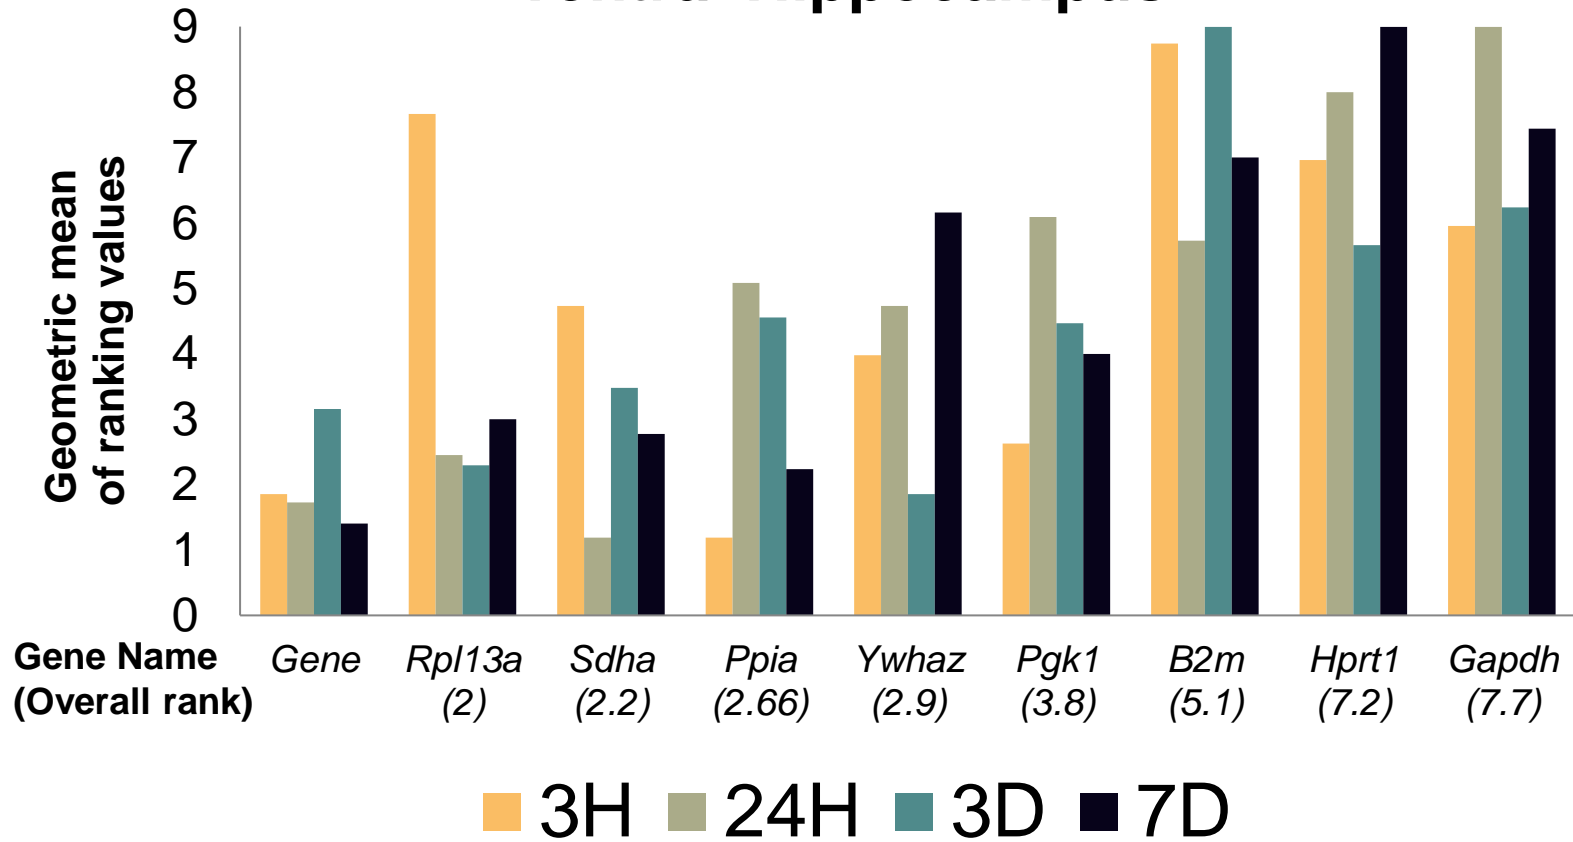

| Time after Seizures | RefFinder Comprehensive ranking (Most stable→Least stable) |               |               |             |              |              |              |              |              |
|---------------------|------------------------------------------------------------|---------------|---------------|-------------|--------------|--------------|--------------|--------------|--------------|
| 3 h                 | <i>Ywhaz</i>                                               | <i>Rpl13a</i> | <i>B2m</i>    | <i>Pgk1</i> | <i>Ppia</i>  | <i>Actb</i>  | <i>Gapdh</i> | <i>Sdha</i>  | <i>Hprt1</i> |
| 24 h                | <i>Ppia</i>                                                | <i>Rpl13a</i> | <i>Sdha</i>   | <i>Pgk1</i> | <i>Ywhaz</i> | <i>Hprt1</i> | <i>B2m</i>   | <i>Gapdh</i> | <i>Actb</i>  |
| 3 days              | <i>Pgk1</i>                                                | <i>Sdha</i>   | <i>Rpl13a</i> | <i>Ppia</i> | <i>B2m</i>   | <i>Ywhaz</i> | <i>Gapdh</i> | <i>Actb</i>  | <i>Hprt1</i> |
| 7 days              | <i>Rpl13a</i>                                              | <i>Ywhaz</i>  | <i>Ppia</i>   | <i>Sdha</i> | <i>B2m</i>   | <i>Pgk1</i>  | <i>Hprt1</i> | <i>Actb</i>  | <i>Gapdh</i> |
| Overall             | <i>Ppia</i>                                                | <i>Rpl13a</i> | <i>Sdha</i>   | <i>Pgk1</i> | <i>B2m</i>   | <i>Actb</i>  | <i>Gapdh</i> | <i>Ywhaz</i> | <i>Hprt1</i> |

**Figure S12.** The reference gene stability within the ventral hippocampus of control and PTZ-treated rats at different time points after seizures. Seizures was induced at P21. Gene expression stability in PTZ-treated and vehicle control animals at different time points (3 h, 1, 3, 7 days; n – 4-7 per group) was assessed by RefFinder online tool.
