# Supplementary material for: Reference Gene Validation in the Brain Regions of Young Rats after Pentylenetetrazole-Induced Seizures
Source: MDPI journal article supplement (doi:10.3390/biomedicines8080239), 2020-07-23
Supplement: s1 [file s1]

# Medial Prefrontal Cortex

## Comparative DeltaCt

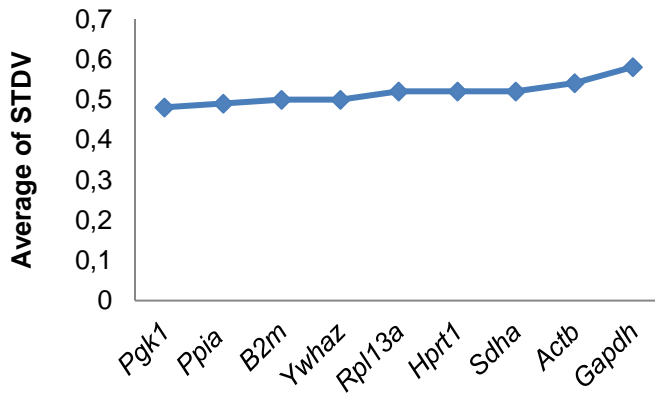

## BestKeeper

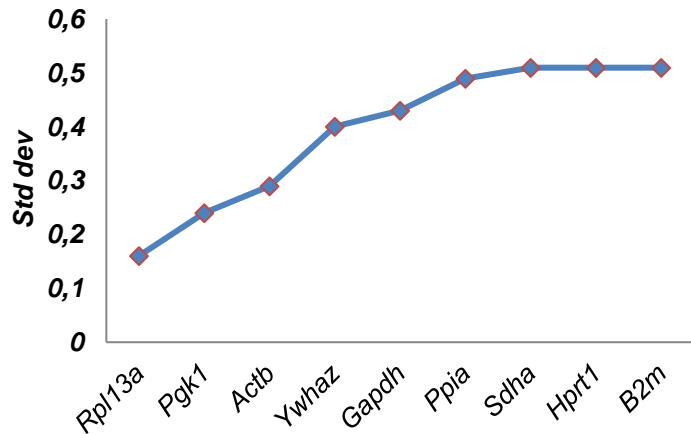

## NormFinder

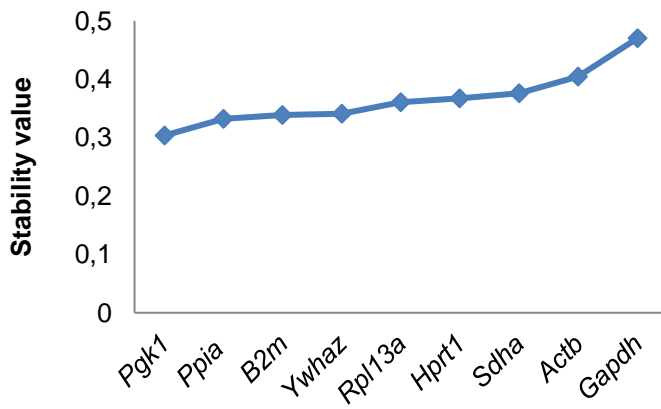

## GeNorm

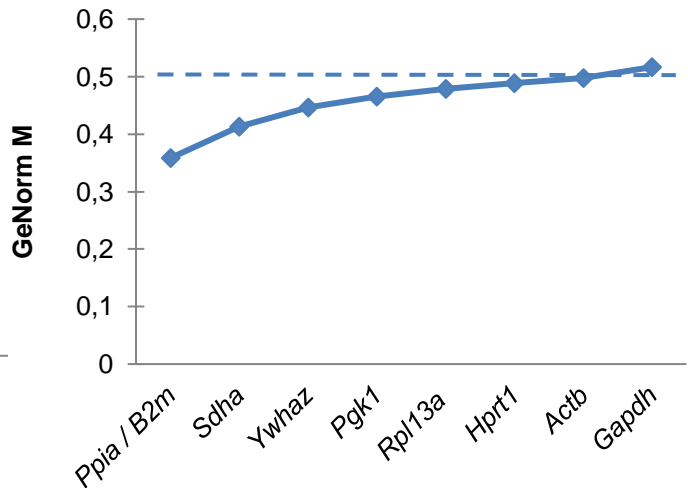

## RefFinder comprehensive ranking

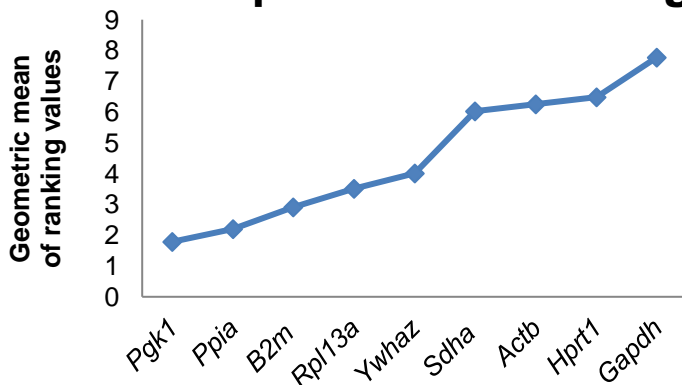

**Fig. S1.** The reference gene stability within the medial prefrontal cortex of control and exposed to PTZ-induced seizures juvenile rats. Seizures was induced at P21. Gene expression stability in PTZ-treated and vehicle control animals was assessed by RefFinder online tool.

# Temporal Cortex

## Comparative DeltaCt

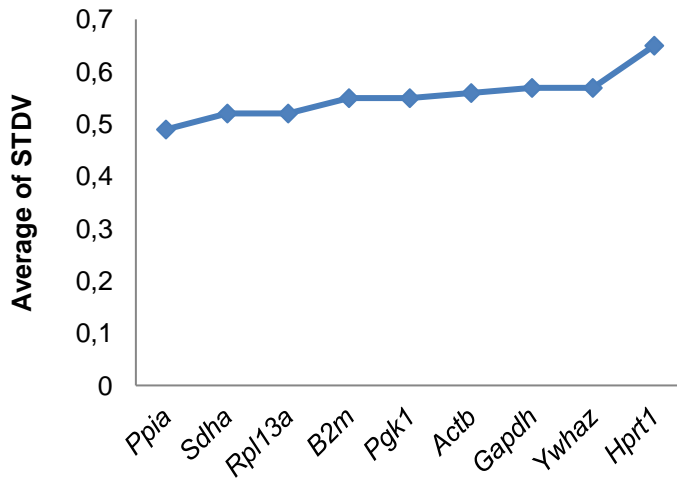

## BestKeeper

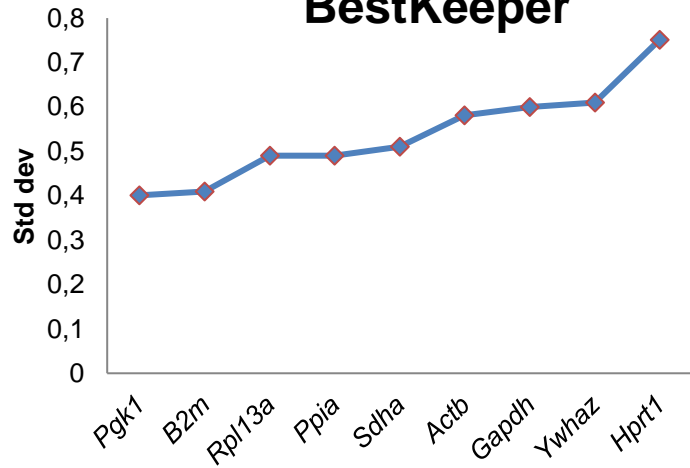

## NormFinder

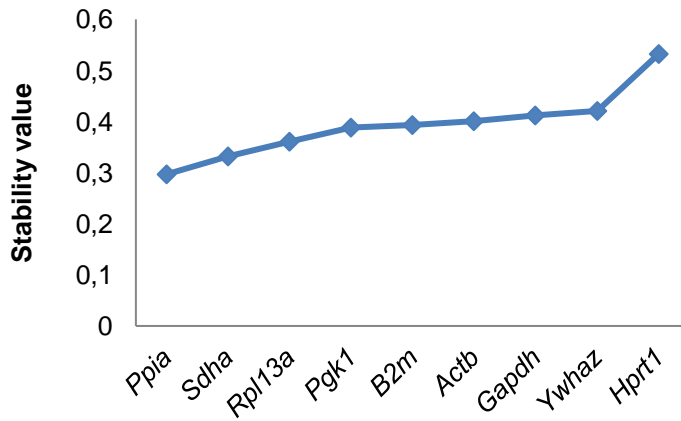

## GeNorm

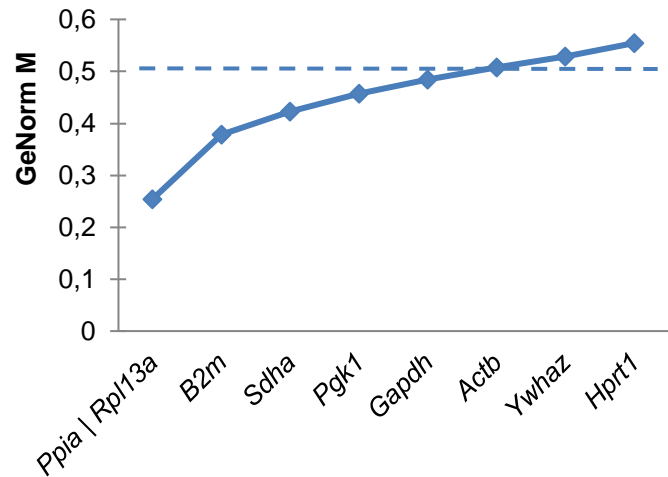

## RefFinder

### comprehensive ranking

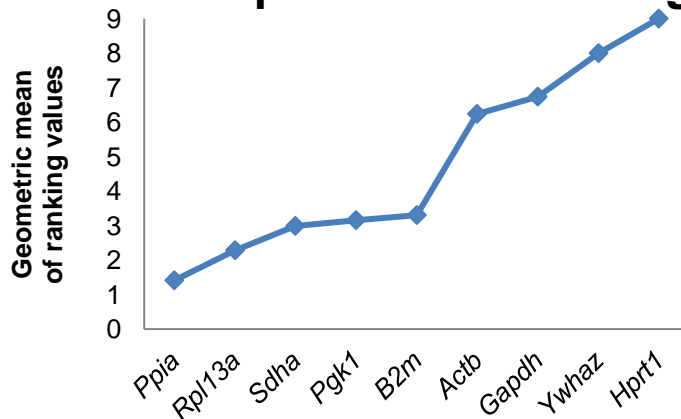

**Fig. S2.** The reference gene stability within the temporal cortex of control and exposed to PTZ-induced seizures juvenile rats. Seizures was induced at P21. Gene expression stability in PTZ-treated and vehicle control animals was assessed by RefFinder online tool.

# Entorhinal Cortex

## Comparative DeltaCt

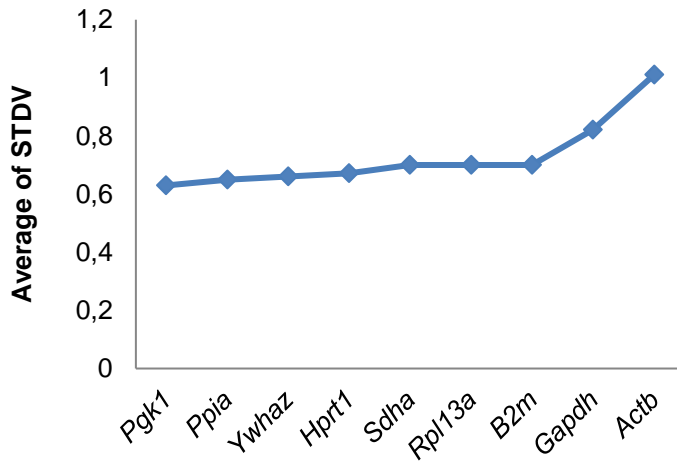

## BestKeeper

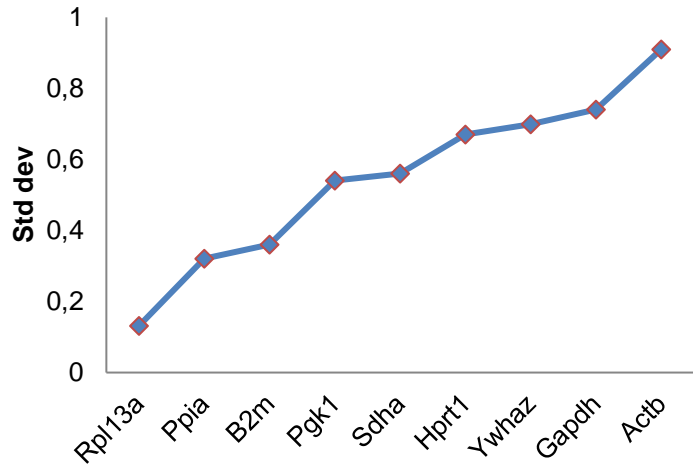

## NormFinder

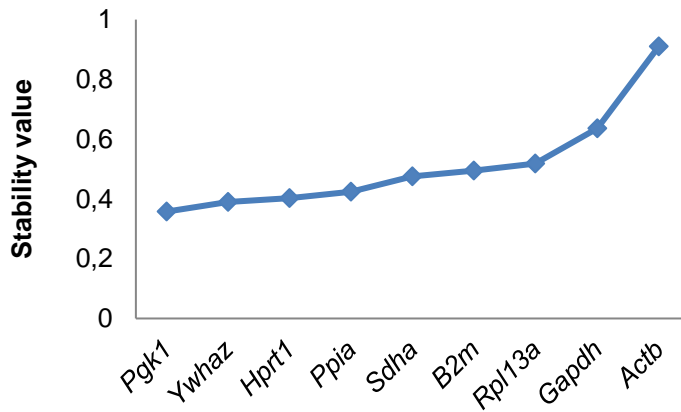

## GeNorm

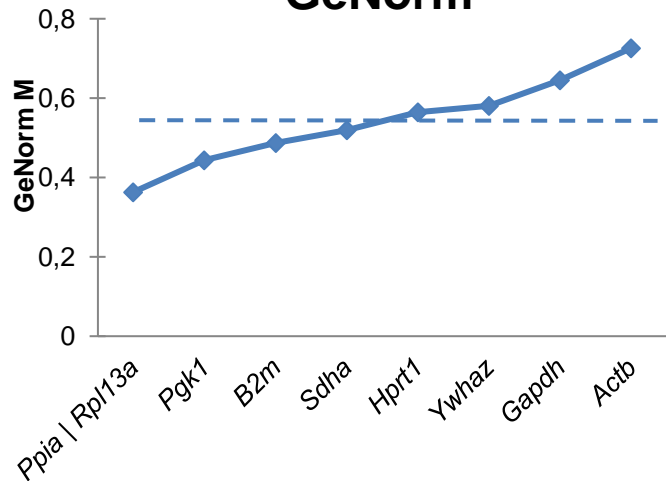

## RefFinder comprehensive ranking

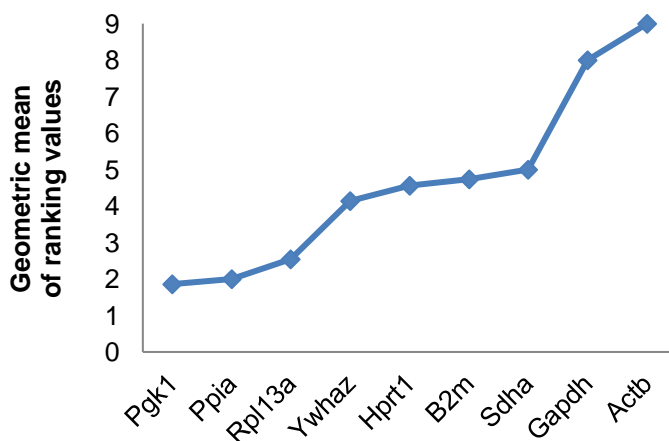

**Fig. S3.** The reference gene stability within the entorhinal cortex of control and exposed to PTZ-induced seizures juvenile rats. Seizures was induced at P21. Gene expression stability in PTZ-treated and vehicle control animals was assessed by RefFinder online tool.

# Amygdala

## Comparative DeltaCt

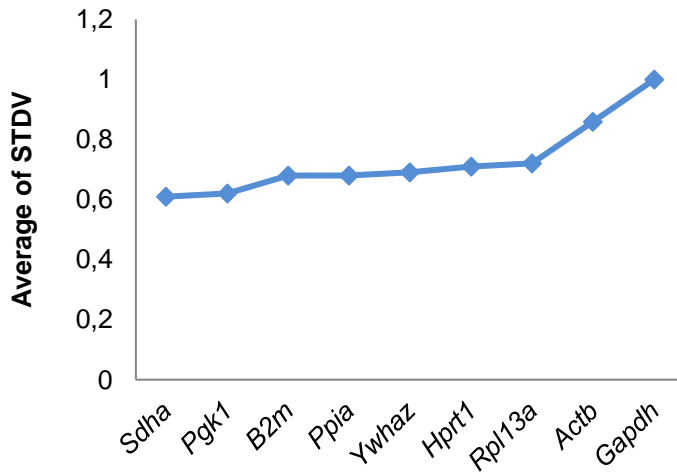

## BestKeeper

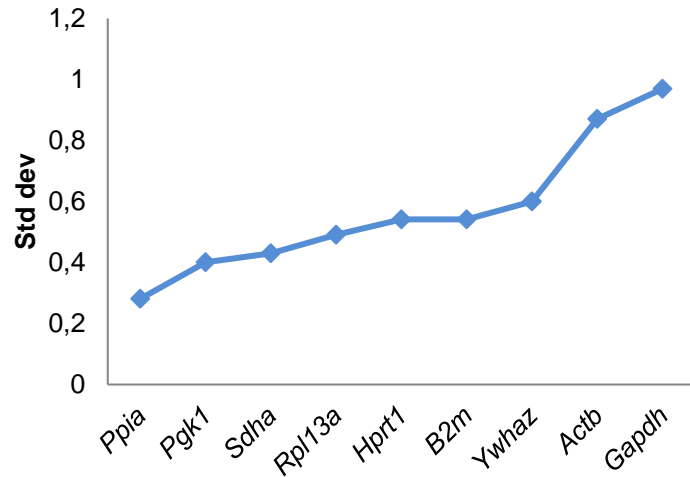

## NormFinder

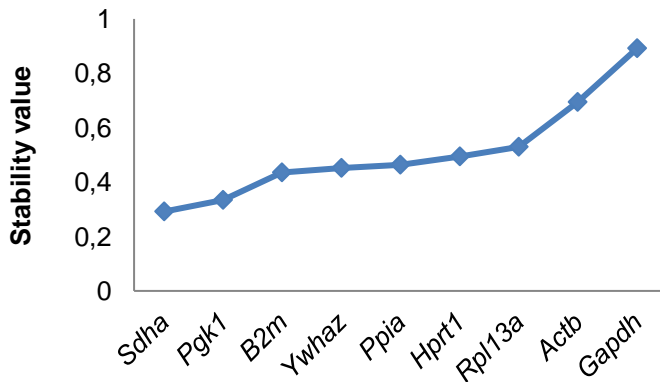

## GeNorm

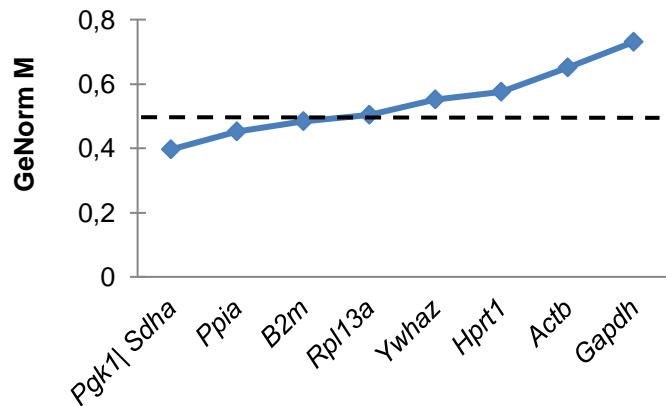

## RefFinder

### comprehensive ranking

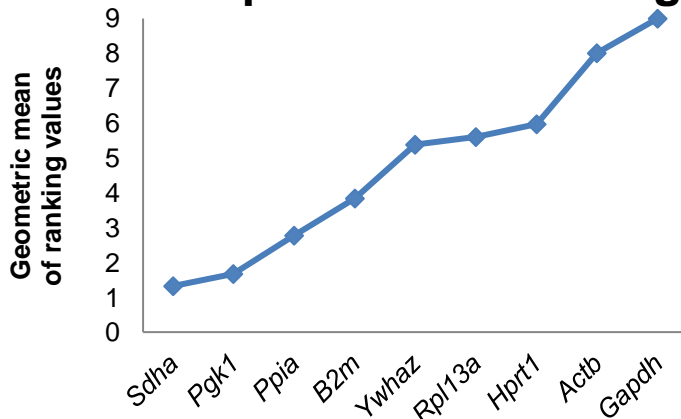

**Fig. S4.** The reference gene stability within the amygdala of control and exposed to PTZ-induced seizures juvenile rats. Seizures was induced at P21. Gene expression stability in PTZ-treated and vehicle control animals was assessed by RefFinder online tool.

# Dorsal Hippocampus

## Comparative DeltaCt

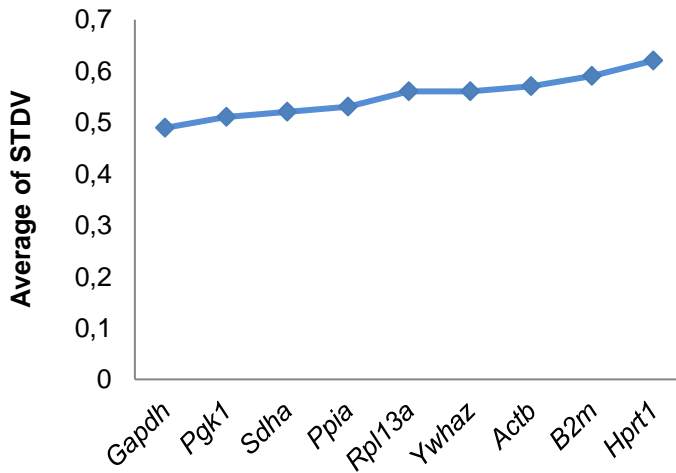

## BestKeeper

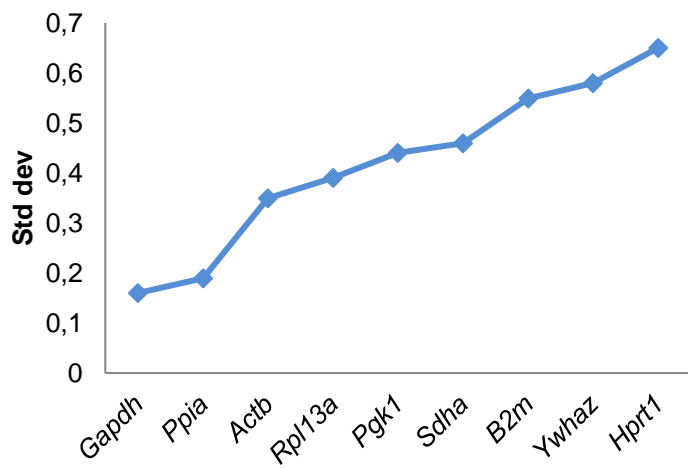

## NormFinder

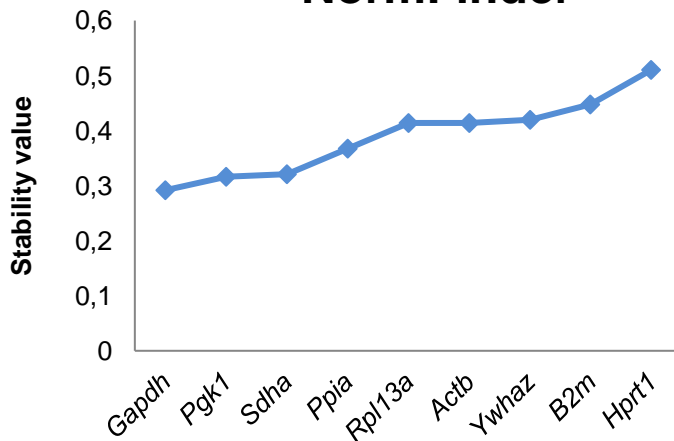

## GeNorm

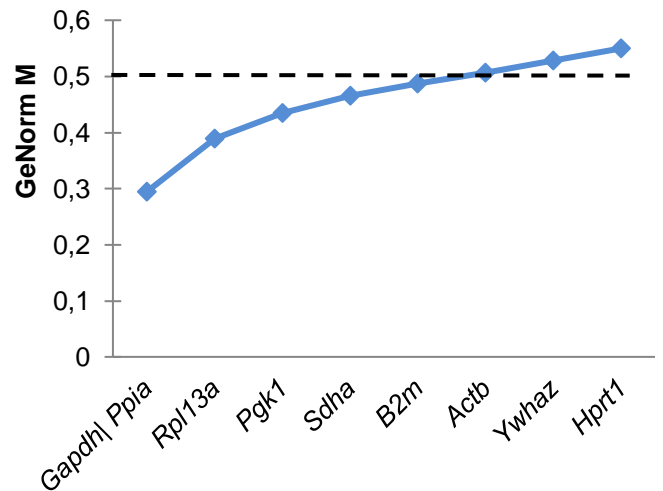

## RefFinder

### comprehensive ranking

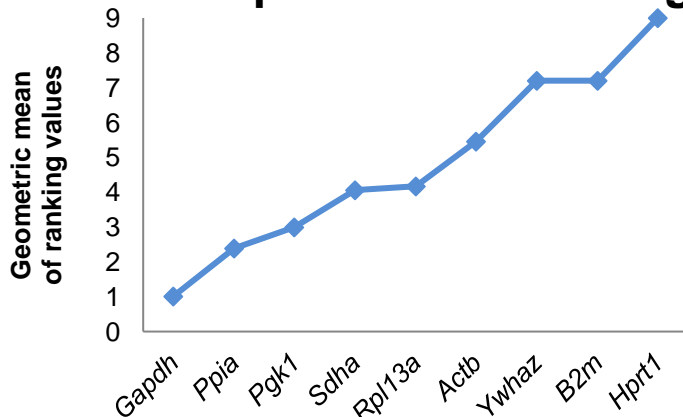

**Fig. S5.** The reference gene stability within the dorsal hippocampus of control and exposed to PTZ-induced seizures juvenile rats. Seizures was induced at P21. Gene expression stability in PTZ-treated and vehicle control animals was assessed by RefFinder online tool.

# Ventral Hippocampus

## Comparative DeltaCt

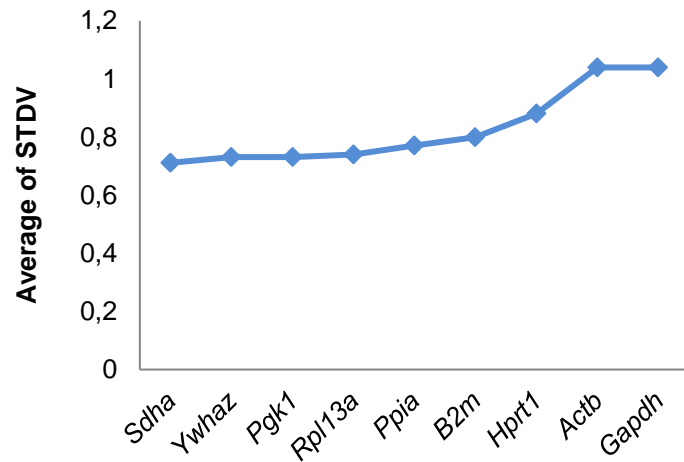

## BestKeeper

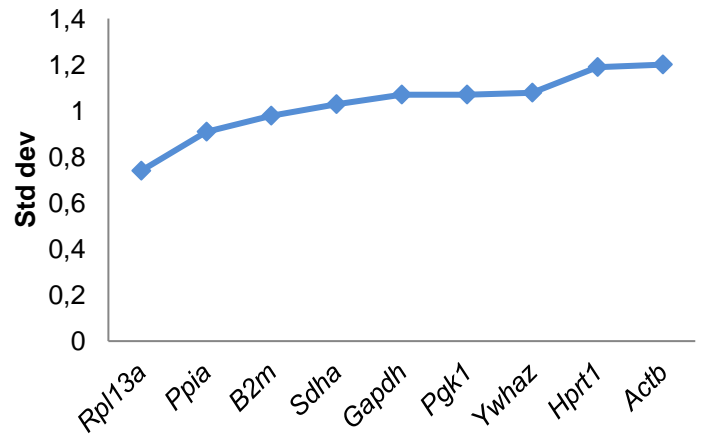

## NormFinder

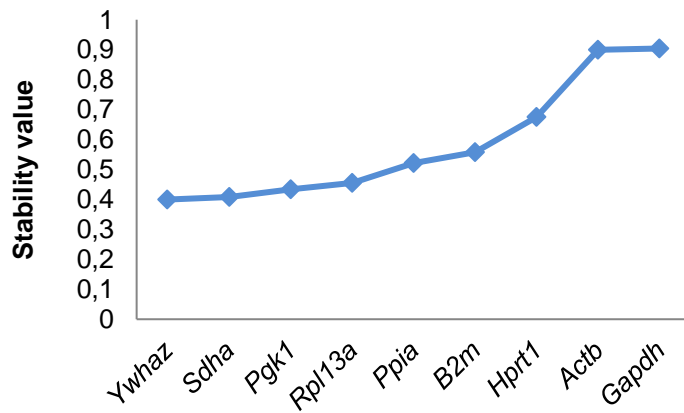

## GeNorm

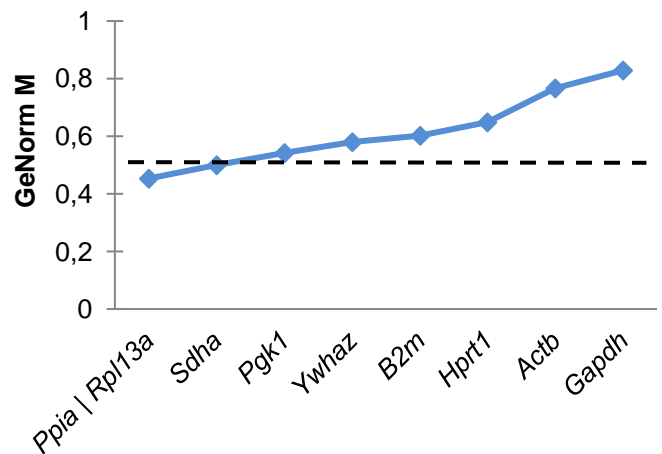

## RefFinder comprehensive ranking

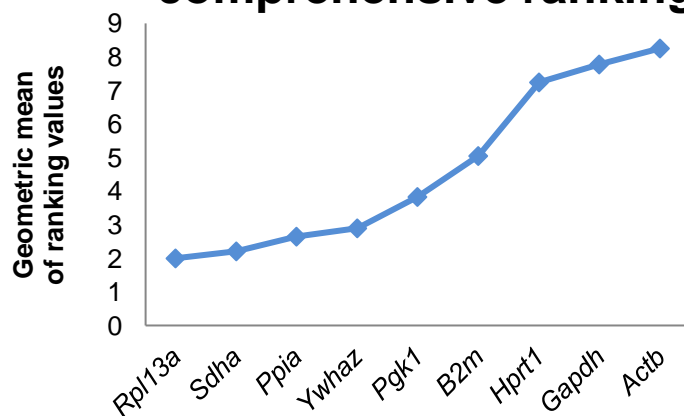

**Fig. S6.** The reference gene stability within the ventral hippocampus of control and exposed to PTZ-induced seizures juvenile rats. Seizures was induced at P21. Gene expression stability in PTZ-treated and vehicle control animals was assessed by RefFinder online tool.
